# Supplementary material
Source: publisher site journal article supplement (https://www.dovepress.com/article/461420)
Supplement: Supplementary file 1 [file get_supplementary_file.php]

## PART 1

**Supplementary table 1. MRI machine parameters**

| Parameters              | T2WI             |            |
|-------------------------|------------------|------------|
|                         | Achieva, Philips | Signa HDxt |
| Sequence                | TSE/FS           | FRFSE      |
| TR (ms)                 | 4900             | 3800       |
| TE (ms)                 | 90               | 110        |
| Flip angle (degree)     | 90               | 90         |
| Echo train length       | 19               | 32         |
| Field of view (mm × mm) | 220×220          | 260×260    |
| Acquisition Matrix      | 220×220          | 320×220    |
|                         | 0                | 4          |
| Slice Thickness (mm)    | 3.5              | 3.5        |

TR, repetition time; TE, time echo; SE, spin echo; FS, fat suppression; DWI, diffusion-weighted imaging; FRFSE, fast relaxation fast spin echo; SE-EPI, spin-echo echo planar imaging.

## PART 2

### Feature selection

We used two feature selection method, the maximum correlation minimum redundancy (mRMR) and the least absolute shrinkage and selection operator (LASSO) to select the feature. At first, mRMR was performed to eliminate the redundant and irrelevant features, 20 features were retained. Then LASSO was conducted to choose the optimized subset of features to construct the final model.

After the number of features determined, the most predictive subset of feature was chosen and the corresponding coefficients were evaluated. Radscore was calculated by summing the selected features weighted by their coefficients.

**Supplementary table 2. The feature composition of each model.**

| <b>Models</b> | <b>Feature no.</b> | <b>Radiomics feature name</b>                                   |
|---------------|--------------------|-----------------------------------------------------------------|
| CE-MRI        | 1                  | T1WI-AP-lbp-3D-m1_firstorder_Median                             |
|               | 2                  | T1WI-PP-wavelet-LLL_glcM_ClusterShade                           |
|               | 3                  | T1WI-AP-wavelet-LLH_gldm_DependenceNonUniformityNormalized      |
|               | 4                  | T1WI-AP-wavelet-LLH_glcM_Idmn                                   |
|               | 5                  | T1WI-AP-log-sigma-2-0-mm-3D_glszm_SmallAreaLowGrayLevelEmphasis |
|               | 6                  | T1WI-PP-wavelet-LLL_glcM_ClusterProminence                      |
|               | 7                  | T1WI-PP-log-sigma-3-0-mm-3D_glcM_MaximumProbability             |
|               | 8                  | T1WI-AP-lbp-3D-m1_firstorder_90Percentile                       |

---

|    |                                                           |
|----|-----------------------------------------------------------|
| 9  | T1WI-AP-log-sigma-2-0-mm-3D_glszm_GrayLevelNonUniformity  |
| 10 | T1WI-AP-original_firstorder_Minimum                       |
| 11 | T1WI-AP-wavelet-HHH_glszm_GrayLevelVariance               |
| 12 | T1WI-AP-original_glcm_Imc2                                |
| 13 | T1WI-PP-wavelet-HLH_firstorder_Mean                       |
| 14 | T1WI-PP-wavelet-LLL_ngtdm_Contrast                        |
| 15 | T1WI-PP-wavelet-HHL_firstorder_Skewness                   |
| 16 | T1WI-PP-wavelet-HLL_glszm_SizeZoneNonUniformityNormalized |

---

**CE-MRI Radscore** = 0.218\* T1WI-AP-lbp-3D-m1\_firstorder\_Median +0.457\*  
T1WI-PP-wavelet-LLL\_glcm\_ClusterShade+-0.909\*T1WI-AP-wavelet-LLH\_gldm  
\_DependenceNonUniformityNormalized +1.492\*  
T1WI-AP-wavelet-LLH\_glcm\_Idmn+-0.843\*T1WI-AP-log-sigma-2-0-mm-3D\_gl  
szm\_SmallAreaLowGrayLevelEmphasis+-0.208\*T1WI-PP-wavelet-LLL\_glcm\_Clu  
sterProminence+-0.635\*T1WI-PP-log-sigma-3-0-mm-3D\_glcm\_MaximumProbabi  
lity+-0.162\*T1WI-AP-lbp-3D-m1\_firstorder\_90Percentile+-1.025\*T1WI-AP-log-si  
gma-2-0-mm-3D\_glszm\_GrayLevelNonUniformity+-0.227\*T1WI-AP-original\_firs  
torder\_Minimum + -0.892\* T1WI-AP-wavelet-HHH\_glszm\_GrayLevelVariance  
+ -0.08\* T1WI-AP-original\_glcm\_Imc2+ -0.111\*  
T1WI-PP-wavelet-HLH\_firstorder\_Mean+0.76\*  
T1WI-PP-wavelet-LLL\_ngtdm\_Contras+0.663\*T1WI-PP-wavelet-HHL\_firstorder\_  
Skewness+ -0.559\*T1WI-PP-wavelet-HLL\_glszm\_SizeZoneNonUniformityNormali

zed + -0.272
